# Supplementary material
Source: Springer Nature journal article supplement (https://www.springermedizin.de/resource/supplementary/12931_2013_1383_MOESM11_ESM.pdf/9426148)

## A. Promoter activity

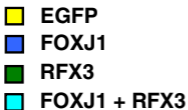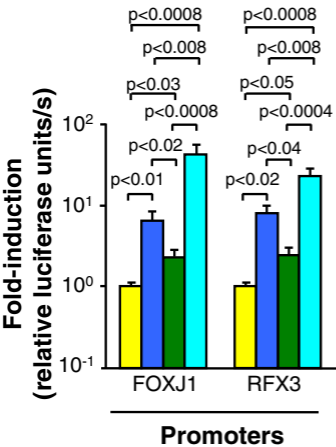

## B. mRNA

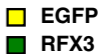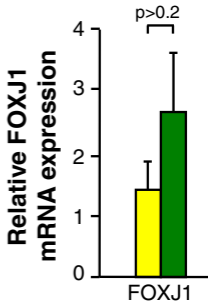

Supplement: MOESM11 [file 9426148]
